# The global importance of metazoans to the biological carbon pump

Jérôme Pinti<sup>1,2</sup>, Tim DeVries<sup>3,4</sup>, Tommy Norin<sup>1</sup>, Camila Serra-Pompei<sup>1,5</sup>,  
Roland Proud<sup>6</sup>, David A. Siegel<sup>3,4</sup>, Thomas Kiørboe<sup>1</sup>, Colleen M. Petrik<sup>7,8</sup>,  
Ken H. Andersen<sup>1</sup>, Andrew S. Brierley<sup>6</sup>, André W. Visser<sup>1</sup>

<sup>1</sup>VKR Centre for Ocean Life, Technical University of Denmark, 2800 Kongens Lyngby, Denmark

<sup>2</sup> College of Earth, Ocean, and Environment, University of Delaware, Lewes, DE 19958, USA

<sup>3</sup> Department of Geography, University of California, Santa Barbara, CA 93106, USA

<sup>4</sup> Earth Research Institute, University of California, Santa Barbara, CA 93106, USA

<sup>5</sup> Department of Earth, Atmospheric and Planetary Sciences, Massachusetts Institute of Technology, Cambridge,  
MA 02139, USA

<sup>6</sup> Pelagic Ecology Research Group, School of Biology, Gatty Marine Laboratory, Scottish Oceans Institute,  
University of St Andrews, St Andrews, Fife KY16 8LB, UK

<sup>7</sup> Department of Oceanography, Texas A&M University, 3146 TAMU, USA

<sup>8</sup> Scripps Institution of Oceanography, University of California San Diego, La Jolla, CA 92107, USA

## Abstract

The daily vertical migrations of fish and other metazoans actively transport organic carbon from the ocean surface to depth, contributing to the biological carbon pump. An important but unanswered question is whether fish play a significant role in the biological carbon pump relative to other organisms, both in terms of carbon export and sequestration. Here, we use a game-theoretic food-web model that simulates diel vertical migrations to estimate global carbon fluxes and sequestration by fish and zooplankton due to respiration, fecal pellets, and deadfalls. Despite uncertainties due to poorly constrained biomass estimates of some functional groups, a robust result of this model is that fish play a major role in the biological carbon pump. Our model estimates that open-ocean metazoans inject  $\sim 3.1$  (range 1.5 - 4.7) PgC/yr of a total of  $\sim 10$  PgC/yr into the ocean's interior. Fish are further responsible for 47% (25-65%) of the oceanic carbon sequestration mediated by metazoans. This essential ecosystem service provided by fishes could be at risk from unregulated fishing in the high seas.

**Keywords**— Diel Vertical Migrations, Food-webs, Game theory, Biological carbon pump, Carbon sequestration, Mesopelagic fish

## 18 Introduction

19 Many marine organisms – from zooplankton to fish – perform diel vertical migrations (DVM) (1, 2), as they seek to  
20 both access food and avoid predators. Small planktivorous organisms feed close to the surface at night, and migrate  
21 to depth during daytime to reduce their predation risk from visual predators (3, 4). In turn, higher trophic levels  
22 organise their vertical migrations to take advantage of their migrating prey while themselves avoiding predators. DVM  
23 within a marine pelagic community is therefore the product of a co-adaptive “game” where many animals seek to  
24 optimize their migration patterns relative to the migration patterns of their respective prey, predators and conspecifics  
25 (5–7).

26 These interacting DVM patterns govern trophic interactions (8) and affect global biogeochemical cycles (9).  
27 Migrating organisms transport carbon obtained through feeding at the surface to depth where it is released through  
28 respiration and excretion. This process, termed the active biological pump (or migrant pump), is highly efficient at  
29 sequestering carbon, because it injects carbon directly at depth and bypasses the remineralization experienced by  
30 passively sinking particles in the upper ocean (10). The biological pump is one of the ocean’s key ecosystem services,  
31 as it mediates the draw-down of atmospheric carbon dioxide by transporting surface carbon to the ocean’s deeper  
32 layers (11), where it can be sequestered for time scales ranging from years to centuries (12).

33 Several studies have explored the effects of DVM on carbon export (13–15), but have mainly focused on export  
34 mediated by zooplankton (13, 15–18). Recent biogeochemical models estimate that active carbon fluxes at the base  
35 of the euphotic zone (our reference depth for export, unless otherwise stated) mediated by migrating organisms range  
36 between 1 and 30  $\text{mgCm}^{-2}\text{day}^{-1}$ , corresponding to 14–18% of the local passive sinking flux (13, 14). However, these  
37 studies did not assess the carbon sequestration potential of these processes. Carbon sequestration represents the  
38 excess dissolved inorganic carbon (DIC) held in the oceans due to biological processes, and is an important measure  
39 to report in addition to carbon export (the rate of carbon being brought below the euphotic zone, either actively or  
40 by passive sinking), as the total amount of DIC held by the ocean determines the atmospheric  $\text{CO}_2$  concentration (9).

41 How fish contribute to the biological carbon pump is currently poorly resolved (19, 20). In particular, the  
42 contribution of mesopelagic fish is potentially of great importance, in part because of their high biomass, which has  
43 recently been estimated to be significantly higher than that of epipelagic fish (21, 22). With biomass estimates  
44 ranging from 1.8 to 16 gigatonnes, mesopelagic fish harbour a huge – but uncertain – potential for active carbon  
45 sequestration through their DVMs and their excretion of fast-sinking fecal pellets (2, 19).

46 We use a pelagic food-web model to investigate the potential impact of different metazoan functional groups  
47 (zooplankton, fish, jellyfish) and pathways (respiration, fecal pellets, deadfalls, other losses) on global ocean carbon  
48 budgets. We specifically consider how groups and pathways directly inject respired and egested carbon at depth, and  
49 their contribution to ocean carbon sequestration. That is, we focus not solely on export flux (i.e. carbon that sinks or  
50 is transported below the euphotic zone as organic carbon) but rather on the conversion of organic carbon into DIC  
51 (dissolved inorganic carbon) in the oceans’ interior – what we term carbon injection. The latter is what matters for  
52 carbon sequestration, as carbon exported can be ingested again by detritivorous animals and brought back to the  
53 surface, whereas DIC cannot. We use spatially resolved realistic estimates of global biomasses to compute the DVM  
54 patterns of the different populations – which accord well with *in situ* observations of vertical distribution biomass  
55 –, and use these global patterns to compute active carbon injection mediated by each group, from both respiration  
56 at depth and degradation of sinking fecal pellets and deadfalls by bacteria and detritivorous organisms. Finally, we

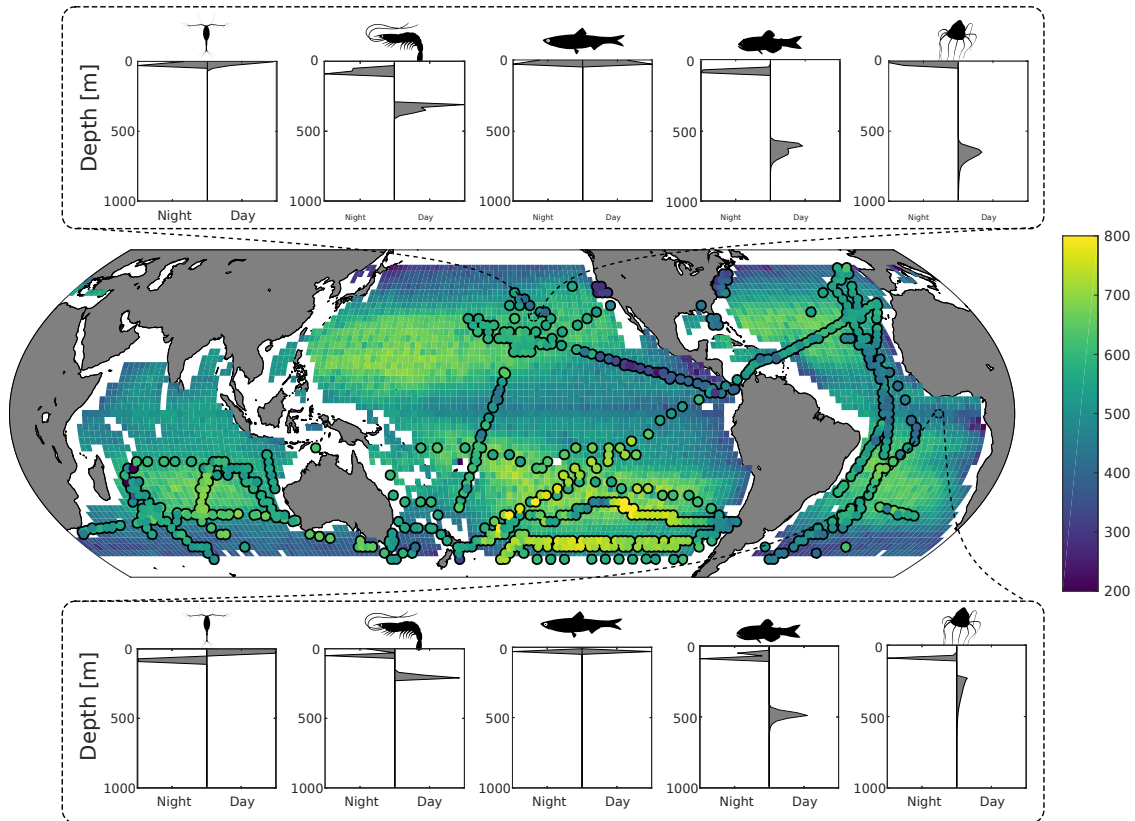

57 combine our results with an ocean circulation inverse model (OCIM) (23, 24) to estimate the total amount of carbon  
58 that is presently sequestered in the global ocean by the metazoan biological carbon pump, and the sequestration  
59 timescale of respired carbon.

60 We initialize the model with physiological parameters describing interactions between individuals and metabolic  
61 rates of the different functional groups, as well as the geographic distribution of physical parameters (light, temperature  
62 and oxygen levels) and the carbon biomass of different functional groups. We base our estimates on a reference  
63 simulation with the most probable parameter values, and provide a range of uncertainties for all reported fluxes, carbon  
64 sequestered estimates, and sequestration timescales, by varying the most uncertain parameters of the model by a fixed  
65 fraction of the reference value (typically between 50-150%, but mesopelagic fish biomass was varied between 20% and  
66 200% of the reference value to account for the 10 fold range in biomass uncertainty). All reported uncertainties are the  
67 most extreme values obtained with the different sensitivity scenarios. These scenarios explore how the propagation  
68 of error plays out in this model by computing how all functions, behaviours, and carbon export and sequestration  
69 metrics respond to the change of one parameter.

## 70 Results

71 The predicted biomass-weighted mean depth (figure 1), taken as the model-predicted mean daytime depth of all fish  
72 weighted by biomass, is deeper in oceanic gyres (between 500-700 m deep), and shallower along the ocean margins  
73 and at the Equator (between 200-400 m). Predicted DVM patterns of the different functional groups (figure 1) can  
74 be compared to echosounder observations. Even though low frequency (e.g. 38 kHz) echosounder observations can  
75 be biased (22), they can be used as a proxy for estimating the mean depth of water-column communities (figure 1  
76 and S7, (2, 25, 26)). Our simulations generally match echosounder observations: meso-zooplankton and forage fish  
77 remain close to the surface, whereas macro-zooplankton and mesopelagic fish (as well as jellyfish) perform vertical  
78 migrations everywhere (Figure 1). At temperate latitudes, our model predicts shallower migrations than observed, in  
79 particular in the Southern Ocean where seasonality can lead to large annual variations in DVM behaviour (27) coupled  
to zooplankton dormancy (28). The mechanistic formulation of the model and the global vertical distribution of

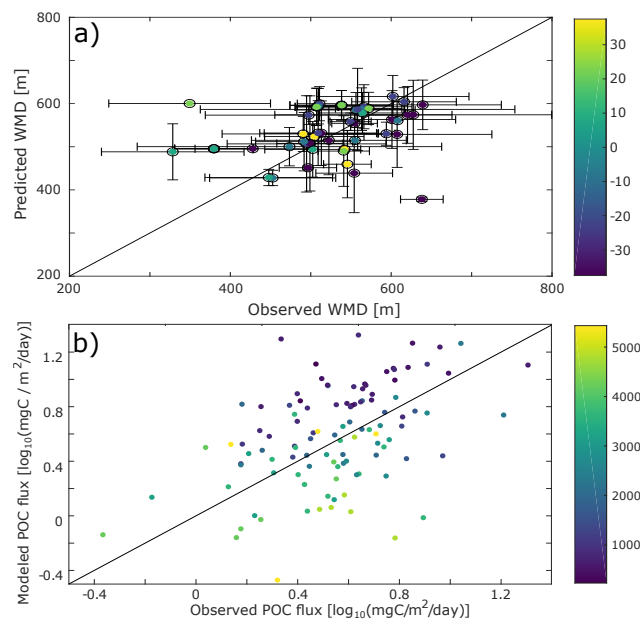

Figure 2: Comparison with data. a) Scatter plot of the differences between the observed and the model predicted depth of the deep scattering layer. b) Difference between the observed (from sediment traps data, (29)) and modeled POC flux. To decrease possible biases due to localized blooms, only fixed sediment traps deeper than 500m and with an annual coverage were selected for this comparison.

80  
81 organisms enables us to compute the strengths of trophic couplings between different functional groups in the model  
82 (figure 3). We find the strongest coupling between mesopelagic fish (total biomass of 0.32 (0.06-0.64) PgC) and macro-  
83 zooplankton, with mesopelagic fish ingesting 1.3 (0.3-2.4) PgC of macro-zooplankton annually (the range of estimates  
84 refer to the most extreme values from the sensitivity analysis). Deadfalls and fecal pellets produced by metazoans in  
85 the euphotic zone contribute to a sinking flux of 1.0 (0.6-1.5) PgC yr<sup>-1</sup> at the base of the euphotic zone (see figure  
86 4 for local estimates). Additionally, 0.4 (0.2-0.7) PgC yr<sup>-1</sup> of fecal pellets and 0.1 (0.1-0.3) PgC yr<sup>-1</sup> of deadfalls  
87 are produced below the euphotic zone by metazoans, which also respire 1.1 PgC yr<sup>-1</sup> (0.6 -1.7) PgC yr<sup>-1</sup> through  
88 basal respiration and 0.4 (0.1-0.8) PgC yr<sup>-1</sup> through other losses below the euphotic zone globally (see figures S11  
89 and S12 for local estimates). Table 1 provides a summary of carbon injection rates due to the different pathways –  
90 basal respiration, fecal pellets, deadfalls, and other losses – for all functional groups.

91 Assuming that the system is at steady state, we can estimate the contributions of the different functional groups

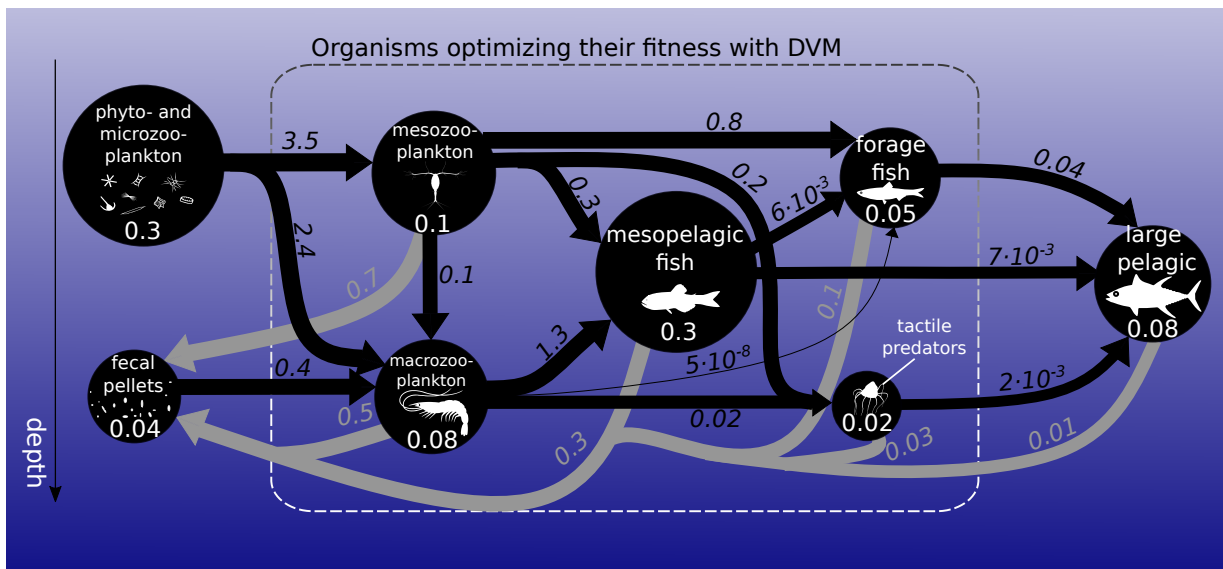

Figure 3: Biomass (circles) and fluxes (arrows) in the food-web integrated over the global ocean. Biomasses are in PgC (white numbers). Black arrows represent ingestion while grey arrows represent fecal pellet excretion in PgC yr<sup>-1</sup>. Arrow widths and circle diameters are proportional to the logarithm of the fluxes and biomasses they represent. Respiration losses are not represented here. The dashed box surrounds the functional groups that optimize their day and night vertical distribution with DVM.

92 to carbon sequestration, as well as the corresponding residence times of respired carbon (figure 4 and table 1).  
 93 Mesopelagic fish are the most important contributors to carbon sequestration with a total of 278 (53-708) PgC  
 94 sequestered, followed by zooplankton (meso- and macro-zooplankton contribute 118 (37-266) and 230 (114-379) PgC  
 95 respectively), forage fish (74 (34-113) PgC), and jellyfish (69 (28-122) PgC). Carbon sequestered via the fecal pellets  
 96 pathway resides in the ocean longer than carbon sequestered via respiration (374 (178-635) years vs. 66 (44-77) years  
 97 for all functional groups, table 1). In addition, carbon sequestered via degradation of fast-sinking fish fecal pellets or  
 98 carcasses is stored on much longer time scales (up to 968 (757-1055) years for forage fish carcasses, and more than a  
 99 thousand years for jellyfish and large pelagic fish carcasses) than carbon sequestered via degradation of slower-sinking  
 100 fecal pellets such as meso-zooplankton (141 (43-360) years). While zooplankton produce the largest carbon fluxes  
 101 globally, carbon injected via fish respiration or degradation of detritus originating from fish is stored more efficiently  
 102 in the ocean's interior – all because larger organisms tend to remain deeper and because they produce larger particles  
 103 that sink faster and thus escape remineralization in the upper parts of the water columns.

104 On a regional level, the absolute magnitude of carbon injected by metazoans below the euphotic zone varies  
 105 significantly, from less than 10 to around 120 mgC m<sup>-2</sup> day<sup>-1</sup> (figure 4a). Subtropical gyres have the lowest injection,  
 106 followed by the tropics, the Southern Ocean, the North Atlantic and North Pacific. The relative contribution of  
 107 mesopelagic fish varies per geographic zone (figure S10), consistent with previous observations (19, 20). Mesopelagic  
 108 fish dominate carbon sequestration via the respiration pathway (more than 70% (34-82%) of the total) due to their  
 109 deep daytime residence depths (figure 1).

110 Some aspects of our predictions can be compared to independent observations or constraints. We already com-  
 111 mented on the DVM predictions. Our predictions of sinking particle fluxes can be compared to observations from  
 112 sediment traps (figure 2b). While there are large differences between data and observations for some locations (up to

113 15 mgC m<sup>-2</sup> day<sup>-1</sup>), the predicted fluxes are of the same order of magnitude as those observed. There is no global or  
114 regional bias in these differences (figure S9) and the depth bias in modeled vs. observed sediment trap flux is consistent  
115 with biases usually witnessed for this type of data (30). Another comparison is the constraint on carbon sequestration  
116 provided by apparent oxygen utilization (AOU). The total respired carbon sequestration cannot exceed the amount  
117 implied by AOU given the stoichiometric relationship between oxygen consumption and dissolved inorganic carbon  
118 (DIC) production during respiration. Our carbon sequestration values are consistent with the AOU constraint, as  
119 they are well below those expected from World Ocean Atlas AOU estimates (31, figure S13). Predicted global ocean  
120 carbon sequestration constrained by World Ocean Atlas AOU data is 1770 PgC across the global ocean, while a recent  
121 study taking into account variations in the concentration of oxygen subducted into the interior ocean (32) estimated  
122 that the interior ocean stores 1300 ( $\pm$  230) PgC (compared to our estimate of 785 (417-1253) PgC for metazoans).  
123 The difference arises because we do not consider all export pathways (e.g. phytoplankton and aggregate sinkings),  
124 and that our spatial coverage accounts for only 63% of the global ocean (no coastal areas nor latitudes higher than  
125  $\pm 45^\circ$ ). Our simulated AOU has a deeper maximum than the observed AOU because we resolve processes with faster  
126 sinking speed, whereas remaining processes (e.g. remineralization of DOC, aggregates and small fecal pellets from  
127 micro-zooplankton) would be concentrated in the upper oceans. Overall, our predictions of DVM, fluxes at depth,  
128 and AOU are compatible with available independent observations.

129 Because the large number of parameters and high computational cost of each simulation prohibit an exhaustive  
130 sensitivity analysis, we focused model sensitivity to nine poorly-constrained parameters: bacterial degradation rate,  
131 fecal pellet sinking speed, biomass of all functional groups, biomass of mesopelagic fish only, assimilation efficiencies,  
132 assimilation efficiency for detritus only, swimming speeds of all organisms, swimming speeds of mesopelagic fish only,  
133 and reference and maximum temperatures for all temperature-dependent rates. These parameters are anticipated to  
134 be those to which carbon injection and sequestration are most sensitive. Overall, the DVM patterns observed are  
135 robust (figure S14). Carbon injected and sequestered vary significantly between sensitivity scenarios, but are mostly  
136 of the same order as the ranges of the parameter variations (table S2-S22). This highlights the need to understand  
137 better mid-water animal ecology and to refine pelagic biomass data estimates, in order to constrain these parameters  
138 more. In addition, we ran a more detailed Monte-Carlo sensitivity analysis for five different ecoregions (subtropical  
139 gyres, tropical area, North Pacific, North Atlantic and Southern Ocean). This analysis confirms that the behaviour  
140 of organisms and passive and active injections are fairly robust to changes in parameter values (figures S16-S20).  
141 Respiration due to other losses, and to a lesser degree the sinking flux below the euphotic zone, is more sensitive to  
142 small changes in parameters than basal respiration and the production of detritus (fecal pellets or carcasses) below the  
143 euphotic zone. The sensitivity to changes in parameter values was similar within ocean ecoregions (figures S16-S20).

## 144 Discussion

145 Our results demonstrate that, despite large uncertainties, fish play a much more important role in the global carbon  
146 cycle than previously assumed – a hypothesis suggested by local estimates (19, 33, 34) and supported by an analysis  
147 of observed data in a recent review (20). Our model is not built on observations of DVM or carbon flux, but on  
148 fundamental mechanistic principles defining the interactions between individuals within different functional groups.  
149 These interactions lead to realistic vertical migration patterns and carbon fluxes that are coupled to a global ocean

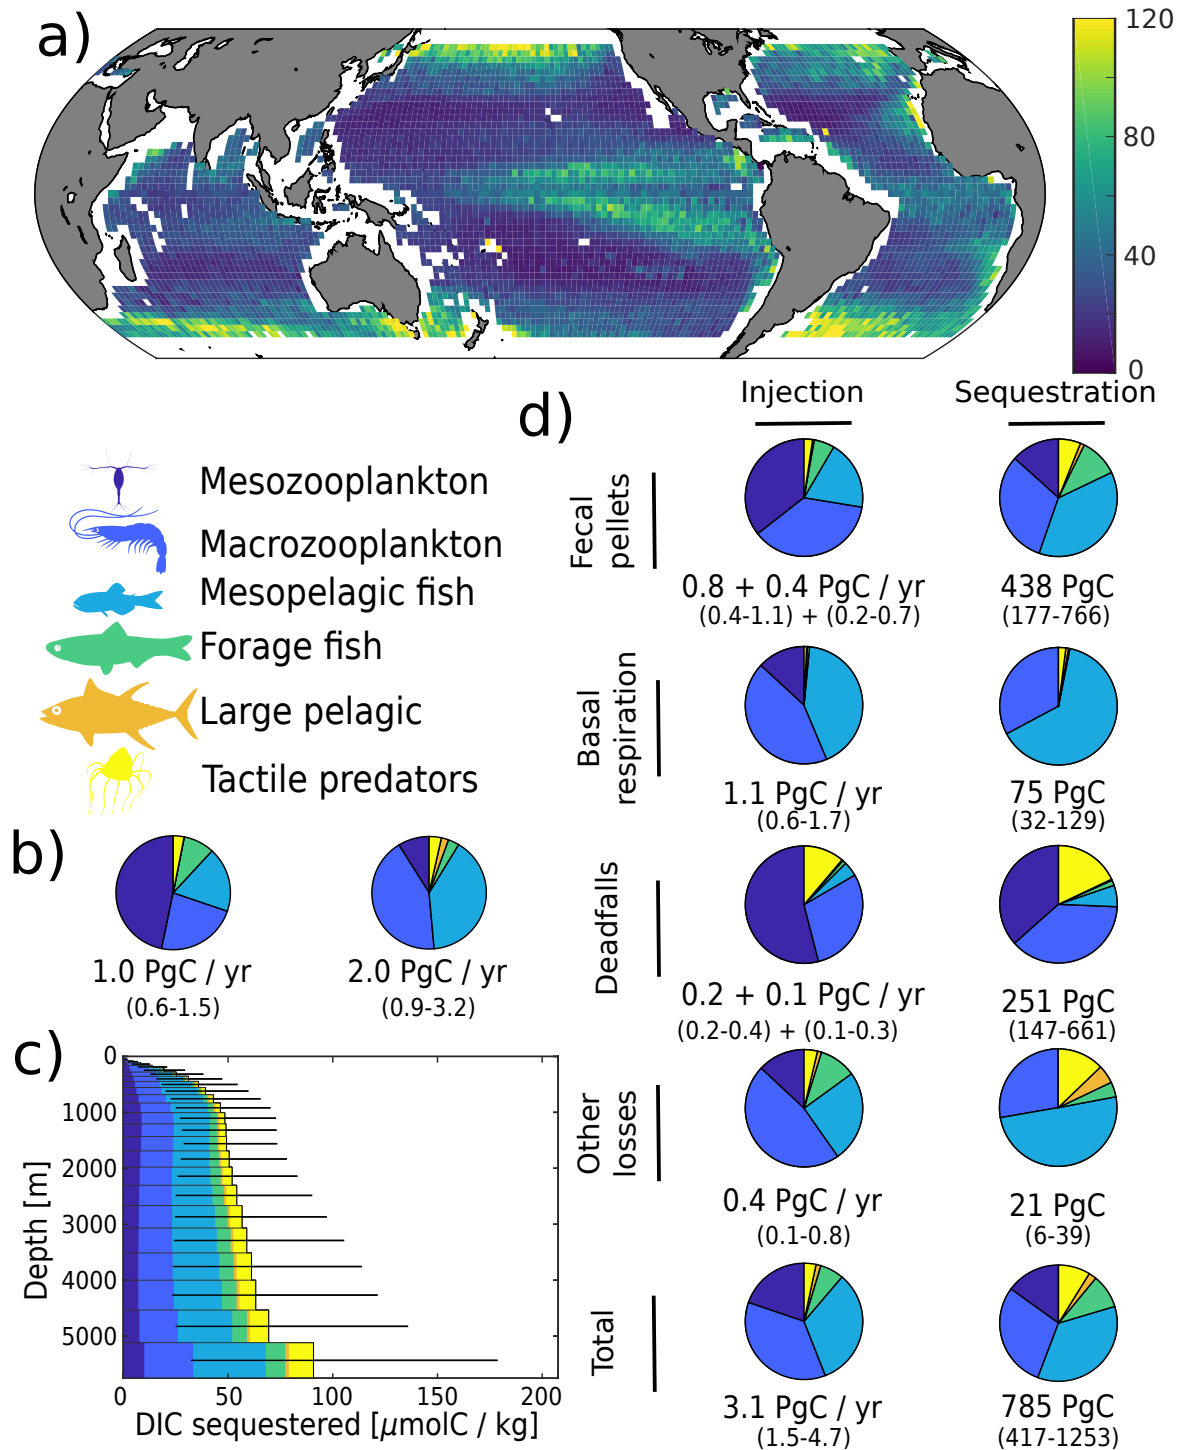

Figure 4: Simulated carbon injection and sequestration by metazoans. a) Simulated injection below the euphotic zone (in  $\text{mgC m}^{-2} \text{day}^{-1}$ ). b) Relative contribution of the simulated functional groups to injection below the euphotic zone. Left panel corresponds to the degradation of organic carbon that was produced in the euphotic zone and subsequently sank below the euphotic zone, right panel corresponds to the degradation of organic carbon that was injected by metazoans directly below the euphotic zone. c) Globally averaged concentration of DIC according to the depth at which it is sequestered. d) Relative contribution of the functional groups to injection and sequestration (left and right column respectively) via the different pathways. For fecal pellets and carcass degradation, the first flux value corresponds to the degradation of organic carbon that was produced in the euphotic zone and subsequently sank below the euphotic zone, while the second corresponds to the degradation of organic carbon that was injected by metazoans directly below the euphotic zone. For basal respiration and other losses, only the direct injection below the euphotic zone is reported as there is no sinking flux for these pathways.

Table 1: Total injection, corresponding sequestration, and sequestration time for the different pathways considered in the model. Respiration pathway corresponds to animal respiration, fecal pellets pathway to bacterial respiration of metazoan fecal pellets, deadfalls to natural mortality, and other losses to all other losses. The range is obtained from the different scenarios of the sensitivity analysis, reported in section S7.1.

| Organism      | Respiration pathway               |                         |                      | Fecal pellets pathway             |                           |                         | Deadfalls pathway                 |                           |                         | Other losses                      |                       |                      | Total                             |                          |                         |
|---------------|-----------------------------------|-------------------------|----------------------|-----------------------------------|---------------------------|-------------------------|-----------------------------------|---------------------------|-------------------------|-----------------------------------|-----------------------|----------------------|-----------------------------------|--------------------------|-------------------------|
|               | Injection [PgC yr <sup>-1</sup> ] | Sequestr. [PgC]         | Sequestr. time [yr]  | Injection [PgC yr <sup>-1</sup> ] | Sequestr. [PgC]           | Sequestr. time [yr]     | Injection [PgC yr <sup>-1</sup> ] | Sequestr. [PgC]           | Sequestr. time [yr]     | Injection [PgC yr <sup>-1</sup> ] | Sequestr. [PgC]       | Sequestr. time [yr]  | Injection [PgC yr <sup>-1</sup> ] | Sequestr. [PgC]          | Sequestr. time [yr]     |
| Meso zoopl.   | 0.1<br>(0.04 - 0.2)               | 0.5<br>(0.1 - 1.3)      | 5<br>(2-9)           | 0.4<br>(0.2 - 0.6)                | 52<br>(12 - 138)          | 141<br>(43-360)         | 0.2<br>(0.1 - 0.2)                | 66<br>(25 - 127)          | 414<br>(177-749)        | 4e-03<br>(0 - 4e-2)*              | 0.02<br>(0 - 0.3)*    | 4<br>(1-7)           | 0.6<br>(0.3 - 1.0)                | 118<br>(37 - 266)        | 185<br>(70-408)         |
| Macro zoopl.  | 0.5<br>(0.2 - 0.8)                | 20<br>(10 - 30)         | 39<br>(34-40)        | 0.4<br>(0.2 - 0.6)                | 118<br>(41 - 254)         | 297<br>(115-617)        | 0.1<br>(0.1 - 0.2)                | 89<br>(43 - 123)          | 785<br>(488-972)        | 0.1<br>(0 - 0.7)*                 | 3<br>(0 - 22)*        | 33<br>(31-35)        | 1.1<br>(0.4 - 1.7)                | 230<br>(114 - 379)       | 206<br>(112-347)        |
| Meso-pelagic  | 0.5<br>(0.1 - 1.0)                | 54<br>(11 - 107)        | 103<br>(101-130)     | 0.3<br>(0.1 - 0.5)                | 163<br>(34 - 317)         | 599<br>(271-896)        | 6e-02<br>(8e-3 - 0.5)             | 49<br>(7 - 456)           | 851<br>(622-984)        | 0.2<br>(0 - 0.3)*                 | 11<br>(0 - 26)*       | 63<br>(50-95)        | 1.0<br>(0.2 - 2.0)                | 278<br>(53 - 708)        | 270<br>(162-500)        |
| Forage fish   | 3e-03<br>(1e-3 - 6e-3)            | 0.04<br>(0.01 - 0.09)   | 12<br>(6-28)         | 0.1<br>(0.04 - 0.1)               | 69<br>(30 - 107)          | 725<br>(415-909)        | 4e-03<br>(2e-3 - 6e-3)            | 4<br>(2 - 6)              | 968<br>(757-1055)       | 0.1<br>(0.03 - 0.1)               | 0.5<br>(0.1 - 1.1)    | 10<br>(4-17)         | 0.2<br>(0.1 - 0.2)                | 74<br>(34 - 113)         | 475<br>(262-655)        |
| Large pelagic | 3e-03<br>(1e-3 - 4e-3)            | 0.4<br>(0.2 - 0.6)      | 156<br>(155-157)     | 0.01<br>(0.03 - 0.04)             | 12<br>(4 - 30)            | 987<br>(878-1036)       | 9e-04<br>(5e-4 - 1e-3)            | 1<br>(0.4 - 1)            | 1003<br>(956-1021)      | 0.03<br>(0.01 - 0.07)             | 4<br>(1 - 10)         | 154<br>(145-158)     | 0.04<br>(0.01 - 0.1)              | 17<br>(5 - 41)           | 407<br>(339-476)        |
| Jellyfish     | 1e-02<br>(4e-3 - 2e-2)            | 1<br>(0.5 - 2)          | 113<br>(95-142)      | 0.03<br>(0.01 - 0.06)             | 24<br>(7 - 53)            | 829<br>(501-1005)       | 0.04<br>(0.02 - 0.06)             | 41<br>(21 - 62)           | 1018<br>(854-1084)      | 0.03<br>(2e-3 - 0.07)             | 2<br>(0.1 - 6)        | 67<br>(50-105)       | 0.1<br>(0.04 - 0.2)               | 69<br>(28 - 122)         | 642<br>(492-875)        |
| <b>Total</b>  | <b>1.1</b><br>(0.6 - 1.7)         | <b>75</b><br>(32 - 129) | <b>66</b><br>(44-77) | <b>1.2</b><br>(0.5 - 1.8)         | <b>438</b><br>(177 - 766) | <b>374</b><br>(178-685) | <b>0.4</b><br>(0.3 - 0.8)         | <b>251</b><br>(147 - 661) | <b>666</b><br>(428-891) | <b>0.4</b><br>(0.1 - 0.8)         | <b>21</b><br>(6 - 39) | <b>54</b><br>(37-64) | <b>3.1</b><br>(1.5 - 4.7)         | <b>785</b><br>(417-1253) | <b>255</b><br>(147-392) |

\*Here, the lowest injection and sequestration value obtained for other losses was negative (and was truncated to 0), meaning that some parameter settings (very high mesopelagic fish biomass) are not compatible with a viable micro- and macro-zooplankton population.



150 circulation model to assess global carbon sequestration. In our model, fish (including mesopelagic fish, forage fish, and  
151 large predators) account for 40% (14-60%) of the carbon injected by metazoans below the euphotic zone. Assuming  
152 a global carbon export due to all processes (i.e. including phytoplankton and microzooplankton) of around 9-10 PgC  
153  $\text{yr}^{-1}$  (35–38), this suggests that fish are responsible for 12% (4-23%) of total export. This figure is in line with a  
154 recent literature review of local studies that estimated that fish were responsible for around 16% ( $\pm 13\%$ ) of carbon  
155 flux out of the euphotic zone (20). More important, our analysis suggests that fish are responsible for 47% (25-65%) of  
156 simulated carbon sequestration by metazoans (table 1). The large influence of fish on carbon sequestration (relative to  
157 injection) is due to the deep migration depths of mesopelagic fish, and the production of large fast-sinking fecal pellets,  
158 both of which lead to long sequestration times for the resulting respired DIC. While these first global mechanistic  
159 estimates of DVM patterns and fish carbon sequestration are subject to uncertainty, they provide a baseline for future  
160 assessments and for evaluating the carbon sequestration impact of fishing.

161 Present global estimates of carbon export are 9-10 PgC  $\text{yr}^{-1}$  (35–38). Our model estimates a total carbon export  
162 of 2.0 (1.2-13.0) PgC  $\text{yr}^{-1}$  below the euphotic zone (table S1), mostly from macro-zooplankton and mesopelagic fish  
163 fecal pellets. The difference between the global estimate of 9-10 PgC  $\text{yr}^{-1}$  and our estimate is because our model  
164 does not include detrital aggregates derived from phytoplankton and unicellular organisms, estimated to account for  
165 an additional 1-2 PgC  $\text{yr}^{-1}$  (38–40), nor the sinking of fecal pellets and carcasses from microzooplankton, estimated  
166 to account for 3-4 PgC  $\text{yr}^{-1}$  (38). Further, our model does not include coastal areas (shallower than 500 m) nor  
167 latitudes higher than  $\pm 45^\circ$ . Coastal areas were not included because our model is unsuited to shallow continental  
168 shelf regions, and high latitudes were not included because of their seasonality – although they can have important  
169 consequences for carbon export, through e.g. zooplankton dormancy (41). With the same spatial coverage as our  
170 model, the SIMPLE-TRIM carbon export model (a data-constrained model that estimates a global export flux of  
171  $\sim 9$  PgC  $\text{yr}^{-1}$ , 37) predicts a total export flux out of the euphotic zone of  $\sim 6$  PgC  $\text{yr}^{-1}$  consistent with the values  
172 provided above.

173 In addition to the passive sinking of fecal pellets and carcasses, our model also predicts carbon export by active  
174 diel vertical migration. Other modelling studies that have assessed the role of DVM on carbon export have relied on  
175 heuristics rather than mechanistic principles (13, 14), and rarely considered functional groups separately to assess  
176 their relative importance (13). Their resulting estimates mostly align with ours. Aumont et al. (14) estimated that  
177 all migrating organisms export about 1.0 PgC  $\text{yr}^{-1}$  below 150 m (this depth is always deeper than the euphotic zone  
178 limit, so this result is hard to relate directly to ours), and Archibald et al. (13) found that zooplankton are responsible  
179 for the export of about 0.8 PgC  $\text{yr}^{-1}$  below the euphotic zone. Global carbon export measurements estimate that  
180 mesopelagic fish are responsible for a carbon flux of  $1.5 \pm 1.2$  PgC  $\text{yr}^{-1}$  (20), a figure in agreement with our simulated  
181 injection of 1.0 (0.2-2.0) PgC  $\text{yr}^{-1}$ . Note that here we are using carbon injection and not carbon export. Carbon  
182 injection is a more relevant metric when it comes to metazoan-driven carbon transport, as (organic) carbon exported  
183 can be uptaken again by detritivorous organisms, while carbon injected (in the form of dissolved inorganic carbon)  
184 cannot be reused by metazoans.

185 Our results are relatively robust, as a factor 2 change in the most sensitive parameter values leads to a factor 2  
186 change in export. The relative importance of fish for carbon sequestration remains high throughout the sensitivity  
187 analysis. One of the most sensitive inputs is biomass, and global estimates are highly uncertain. For example,  
188 mesopelagic fish global biomass estimates vary between 20 and 200% of the reference estimate due to the uncertainty

189 in translating echosounder observations into biomass estimates (22). Gelatinous zooplankton estimates are still highly  
190 imprecise (42), but potentially of considerable importance. A recent study (43) estimated that gelatinous zooplankton  
191 were responsible for a global export of 1.6-5.2 PgC yr<sup>-1</sup> below 100 m. Even though that study included coasts and  
192 high latitudes and had a fixed depth horizon, their estimate is still much higher than our estimate of a total injection  
193 of 0.1 (0.04-0.2) PgC yr<sup>-1</sup> below the euphotic zone for jellyfish, perhaps because their study –unlike this one– included  
194 gelatinous zooplankton that can also feed on phytoplankton and micro-zooplankton.

195 An omitted functional group of this model is bathypelagic fish. These fish constantly live below ~1000 m,  
196 potentially migrating daily between bathyal depths (up 4000 m deep) and the mesopelagic zone, taking up the lower  
197 rungs of Vinogradov’s ladder (44). These organisms, feeding on mesopelagic fish (that can also, sometimes, migrate  
198 below 1000 m (34, 45)), would tend to increase the time scales on which carbon is sequestered. The biomass of  
199 bathypelagic fish is, however, even less well known than the biomass of mesopelagic fish. Therefore, their potential  
200 contribution to global carbon sequestration is hard to assess. We can only conjecture that carbon sequestered  
201 because of bathypelagic fish respiration and excretion would be sequestered on very long time scales given the depths  
202 at which these organisms live. This consideration emphasizes further the importance of considering carbon injection  
203 and sequestration in addition to carbon export. While carbon export is an important metric, it only gives a partial  
204 idea of ocean carbon budgets. Carbon injection – the depth dependent biologically mediated source of DIC – is a  
205 more relevant metric that all biological pump studies should strive to estimate, whether focusing on the degradation  
206 of sinking POC (i.e. bacterial respiration) or respiration from vertical migrants.

207 As anthropogenic pressures increase, the last realm to remain relatively undisturbed by human activities is the deep  
208 sea. This may change because of commercial incentives to fish on the vast resource that mesopelagic fish represents  
209 (46). It has been suggested that 50% of the existing mesopelagic biomass can be sustainably extracted (46). However,  
210 fishing may have implications for carbon sequestration (47, 48). Even by assuming that only 25% of their biomass is  
211 harvested annually, then to first order that would reduce their contribution by 25%, i.e., by 70 (13-177) PgC (which  
212 is equivalent to 257 (49-655) Pg CO<sub>2</sub>). At € 80 per tonne of CO<sub>2</sub> (CO<sub>2</sub> European Emission Allowances, April 2022),  
213 the carbon off-set value of 25% of mesopelagic fish biomass would be € 20 (4-52) trillion. This estimate demonstrates  
214 that there is a trade-off between economic gain of developing mesopelagic fishing and the cost of the forgone carbon  
215 sequestration.

## 216 Methods

217 The behavioural part of our model is a 1D model depicting a pelagic community, from surface waters to mesopelagic  
218 depths (figure 3). The model resolves migrating functional groups: meso-zooplankton, macro-zooplankton, forage  
219 fish, large pelagic fish, jellyfish, and mesopelagic fish, as well as non-migrating resources of phytoplankton and micro-  
220 zooplankton. The biomass of all groups is fixed. The vertical distribution of phytoplankton depends on the mixed  
221 layer depth. Large pelagic fish are assumed to be uniformly distributed in the water column as they are proficient  
222 swimmers that are able to move up and down the water column several times a day Holland1992, Thygesen2016. This  
223 distribution also implies a uniform distribution of predation risk (depth effects aside) for prey, consistent with the fact  
224 that predators can relocate much faster than their prey. All other functional groups can move in the water column  
225 and our model computes the optimal day and night distribution of all organisms in the water column simultaneously.

226 Detritus is created by organisms (through fecal pellet production or by natural mortality), sinks, and gets degraded  
227 or ingested by macro zooplankton along the way.

228 An organism's optimal strategy (i.e. day and night positions) maximises its fitness given the position of all other  
229 organisms in the water column. As an individual selects a strategy, the fitness of its prey, predators and conspecifics also  
230 varies. Hence, the optimal strategy of all individuals is intrinsically linked to the optimal strategy of all other players.  
231 The optimal strategies for all individuals is attained at the Nash equilibrium Nash1951, where no individual can  
232 increase its fitness by changing its strategy. The Nash equilibrium is found using the replicator equation Hofbauer2003,  
233 Pinti2019, Pinti2019b. In short, the fraction of the population following a particular strategy grows proportionally to  
234 the fitness related to that strategy.

235 The fitness measure used is Gilliam's rule Houston1993, i.e. growth divided by mortality. In a steady environment,  
236 this is a valid approximation to life-time reproductive success as an organism that constantly optimises this measure  
237 will maximise its life-time reproductive success Sainmont2015. The fitness is calculated from simple trait-based  
238 mechanistic principles. In the water column, abiotic conditions (temperature, light levels, oxygen concentration)  
239 vary vertically, impacting vital rates and trophic interactions between organisms, in turn affecting the fitness of  
240 organisms. Light levels also vary between day and night, creating the possibility for organisms to perform DVM — if  
241 the optimal strategy is to change vertical position during day and night. Mixed layer depths vary spatially, impacting  
242 the distribution of phytoplankton.

243 The growth rate of organisms is the assimilation rate minus standard metabolic rate and migration cost. The  
244 mortality rate is the mortality due to predation plus a small background mortality. Predators and prey swim at a  
245 constant speed and encounter each other depending on the clearance rate of the predator (for visual predators, this  
246 varies vertically due to light attenuation in the water and between day and night). The probability of capture in  
247 each encounter event depends on the escape speed of prey and the attack speed of predators, both varying with the  
248 aerobic scope of the corresponding organism (which depends on the local oxygen and temperature conditions). The  
249 ingestion rate of each organism is modulated by a type II functional response, except for jellyfish that follow a type  
250 I functional response with no saturation at high prey concentrations Holling1959, Titelman2006. An ingested prey is  
251 then assimilated with a certain efficiency. The fraction not assimilated is egested as fecal pellets. Moreover, organisms  
252 dying of natural mortality (background mortality and not predation) sink as carcasses with a fast sinking velocity,  
253 bringing carbon to depths as carcasses get degraded by bacteria. All details, equations and parameters for fitness  
254 calculations are given in the supplementary material.

255 This 1D behavioural model is run at a global scale, informed by global biomass, temperature and oxygen levels  
256 estimates. Global biomass estimates of plankton are outputs of the COBALT model Stock2014, Stock2017, forage  
257 fish and large pelagic fish biomasses are outputs of the FEISTY model Petrik2019, and mesopelagic fish biomass  
258 is calculated from acoustic backscatter Proud2017, Proud2018. Environmental drivers (temperature, oxygen, light  
259 attenuation coefficient, and mixed layer depth) are taken from the World Ocean Atlas 2018 Locarnini2019, Garcia2019.  
260 Global inputs are pictured in figures S4 and S5.

261 Once the global behaviour of organisms is computed, we compute the amount of carbon respired, egested as fecal  
262 pellets, or sinking as carcasses for each functional group. This directly provides us with global carbon export and  
263 injection estimates. The animal respiration rates (basal respiration and other losses – an aggregate of all processes  
264 not accounted for in the model, such as specific dynamic action and reproduction) and bacterial respiration rates (due

265 to the degradation of fecal pellets and carcasses) are then used to compute the carbon sequestration by each pathway  
266 using a data-constrained steady-state ocean circulation inverse model [OCIM,][DeVries2011,DeVries2014, Holzer2021,  
267 providing estimates of the amount of carbon sequestered in the oceans via the different pathways, assuming equilibrium  
268 conditions. Dividing the amount of carbon sequestered by the corresponding global injection yields the sequestration  
269 time of respired carbon, a measure of the time scale on which carbon is sequestered.

270 The source code (written in MATLAB) supporting this article has been uploaded as part of the supplementary  
271 material and is available at: [https://github.com/JeromeAqua/Global\\_contribution\\_fish](https://github.com/JeromeAqua/Global_contribution_fish)

## 272 Data, code and material

273 The source code (written in MATLAB) supporting this article has been uploaded as part of the supplementary material  
274 and is available at: [https://github.com/JeromeAqua/Global\\_contribution\\_fish](https://github.com/JeromeAqua/Global_contribution_fish).

## 275 Acknowledgements

276 This work was supported by the Centre for Ocean Life, a VKR Centre of excellence funded by the Villum Foundation,  
277 and by the Gordon and Betty Moore Foundation (grant #5479). ASB and RP were funded in part through the EU  
278 BG3 project ‘SUMMER’ and BG8 project ‘Mission Atlantic’. Collated echosounder data obtained from the BODC  
279 included observations made during the Atlantic Meridional Transect. The Atlantic Meridional Transect is funded  
280 by the UK Natural Environment Research Council through its National Capability Long-term Single Centre Science  
281 Programme, Climate Linked Atlantic Sector Science (grant number NE/R015953/1). This study contributes to the  
282 international IMBeR project and is contribution number 378 of the AMT programme.

## 283 Author contributions

284 JP designed the study with help from AWV and TK. RP, CMP, and ASB contributed biomass data. JP conducted  
285 the study with technical assistance from TDV, TN, CSP, DAS, TKA, KHA, and AWV. JP analysed results with  
286 help from TDV, DAS, CSP, TK, KHA, and AWV. JP wrote the manuscript with contributions from all authors. All  
287 authors approved the manuscript and agreed to be held personally accountable for their own contributions.

## 288 References

- 289 1. I. A. McLaren, *Journal of the Fisheries Research Board of Canada* **20**, 685–727, ISSN: 0015-296X (1963).
- 290 2. T. A. Klevjer *et al.*, *Scientific Reports* **6**, 19873 (Apr. 2016).
- 291 3. T. M. Zaret, S. Suffern, *Limnology and Oceanography* **21**, 804–813, ISSN: 00243590 (1976).
- 292 4. W. Lampert, *Archiv her Hydrobiologie, Beiheft Ergebnisse der Limnologie* **39**, 79–88, ([https://pure.mpg.de/pubman/faces/ViewItemOverviewPage.jsp?itemId=item%7B%5C\\_%7D1508686%20http://www.crcnetbase.com/doi/10.1081/E-EEE2-120046011](https://pure.mpg.de/pubman/faces/ViewItemOverviewPage.jsp?itemId=item%7B%5C_%7D1508686%20http://www.crcnetbase.com/doi/10.1081/E-EEE2-120046011)) (Dec. 1993).
- 294

- 295 5. D. M. Hugie, L. M. Dill, *Journal of Fish Biology* **45**, 151–169 (1994).
- 296 6. J. Pinti, A. W. Visser, *The American Naturalist* **193**, E000–E000, ISSN: 0003-0147, (<https://www.journals.uchicago.edu/doi/10.1086/701041>) (Dec. 2019).
- 297
- 298 7. J. Pinti, T. Kjørboe, U. H. Thygesen, A. W. Visser, *Proceedings of the Royal Society B: Biological*  
299 *Sciences* **286**, 20191645 (Sept. 2019).
- 300 8. K. Bandara, Ø. Varpe, L. Wijewardene, V. Tverberg, K. Eiane, *Biological Reviews* (2021).
- 301 9. K. O. Buesseler, P. W. Boyd, *Limnology and Oceanography* **54**, 1210–1232, ISSN: 00243590 (2009).
- 302 10. P. W. Boyd, H. Claustre, M. Levy, D. A. Siegel, T. Weber, *Nature* **568**, 327–335, ISSN: 14764687,  
303 (<http://dx.doi.org/10.1038/s41586-019-1098-2>) (2019).
- 304 11. P. G. Falkowski, R. T. Barber, V. Smetacek, *Science* **281**, 200–206, ISSN: 00368075 (1998).
- 305 12. T. DeVries, F. Primeau, C. Deutsch, *Geophysical Research Letters* **39**, 1–5, ISSN: 00948276 (2012).
- 306 13. K. M. Archibald, D. A. Siegel, S. C. Doney, *Global Biogeochemical Cycles* **33**, 181–199 (2019).
- 307 14. O. Aumont, O. Maury, S. Lefort, L. Bopp, *Global Biogeochemical Cycles* **32**, 1–22, ISSN: 19449224,  
308 (<https://agupubs.onlinelibrary.wiley.com/doi/abs/10.1029/2018GB005886?af=R>) (2018).
- 309 15. T. Gorgues, O. Aumont, L. Memery, *Geophysical Research Letters*, 2018GL081748, ISSN: 0094-8276,  
310 (<https://onlinelibrary.wiley.com/doi/abs/10.1029/2018GL081748>) (2019).
- 311 16. A. Longhurst, A. Bedo, W. Harrison, E. Head, D. Sameoto, *Deep Sea Research Part A. Oceanographic*  
312 *Research Papers* **37**, 685–694, ISSN: 01980149, ([http://linkinghub.elsevier.com/retrieve/pii/](http://linkinghub.elsevier.com/retrieve/pii/019801499090098G)  
313 [019801499090098G](http://linkinghub.elsevier.com/retrieve/pii/019801499090098G)) (Apr. 1990).
- 314 17. D. K. Steinberg *et al.*, *Deep Sea Research Part I* **47**, 137–158, ISSN: 09670637 (Jan. 2000).
- 315 18. A. N. Hansen, A. W. Visser, *Limnology and Oceanography* **61**, 701–710, ISSN: 19395590 (2016).
- 316 19. P. C. Davison, D. M. Checkley, J. A. Koslow, J. Barlow, *Progress in Oceanography* **116**, 14–30, ISSN:  
317 00796611, (<http://dx.doi.org/10.1016/j.pocean.2013.05.013>) (2013).
- 318 20. G. K. Saba *et al.*, *Limnology and Oceanography*, 1–26 (2021).
- 319 21. X. Irigoien *et al.*, *Nature communications* **5**, 3271, ISSN: 20411723, ([http://www.nature.com/](http://www.nature.com/doi/10.1038/ncomms4271)  
320 [doifinder/10.1038/ncomms4271](http://www.nature.com/doi/10.1038/ncomms4271)) (Feb. 2014).
- 321 22. R. Proud, N. O. Handegard, R. J. Kloser, M. J. Cox, A. S. Brierley, *ICES Journal of Marine Science*  
322 **76**, ed. by D. Demer, 718–733, ISSN: 1054-3139, ([https://academic.oup.com/icesjms/article/76/](https://academic.oup.com/icesjms/article/76/3/718/4978316)  
323 [3/718/4978316](https://academic.oup.com/icesjms/article/76/3/718/4978316)) (May 2019).
- 324 23. T. DeVries, F. Primeau, *Journal of Physical Oceanography* **41**, 2381–2401, ISSN: 00223670 (2011).
- 325 24. T. DeVries, *Global Biogeochemical Cycles* **28**, 631–647, ISSN: 19449224 (2014).
- 326 25. IMOS, *IMOS BASOOP sub facility*, 2021, (2021; [imos.org.au](http://imos.org.au)).

- 327 26. Polar Data Centre British Antarctic Survey, *Raw acoustic data collected by ship-borne EK60 echosounder*  
328 *in the Atlantic Ocean (AMT24, AMT25, AMT26, AMT29)*. (2020).
- 329 27. P. K. Prihartato, D. L. Aksnes, S. Kaartvedt, *Marine Ecology Progress Series* **521**, 189–200 (2015).
- 330 28. K. Bandara *et al.*, *Marine Ecology Progress Series* **555**, 49–64, ISSN: 01718630 (2016).
- 331 29. M. J. Lutz, K. Caldeira, R. B. Dunbar, M. J. Behrenfeld, *Journal of Geophysical Research: Oceans* **112**,  
332 ISSN: 21699291 (2007).
- 333 30. R. Schlitzer, R. Usbeck, G. Fischer, in *The South Atlantic in the Late Quaternary: Reconstruction of*  
334 *material budgets and current systems*, ed. by G. Wefer, S. Mulitza, V. Ratmeyer (Springer-Verlag, 2003),  
335 pp. 1–19, ISBN: 9783642189173.
- 336 31. H. Garcia *et al.*, “WORLD OCEAN ATLAS 2018 Volume 3: Dissolved Oxygen, Apparent Oxygen  
337 Utilization, and Dissolved Oxygen Saturation”, tech. rep. (Silver Spring, MD, 2019), p. 38, ([https :](https://www.nodc.noaa.gov/OC5/woa18/pubwoa18.html)  
338 [//www.nodc.noaa.gov/OC5/woa18/pubwoa18.html](https://www.nodc.noaa.gov/OC5/woa18/pubwoa18.html)).
- 339 32. B. R. Carter *et al.*, *Global Biogeochemical Cycles* **35**, ISSN: 19449224, ([https://doi.org/10.1029/](https://doi.org/10.1029/2020GB006623)  
340 [2020GB006623](https://doi.org/10.1029/2020GB006623)) (2021).
- 341 33. G. K. Saba, D. K. Steinberg, *Scientific Reports* **2**, 1–6, ISSN: 20452322 (2012).
- 342 34. J. M. Hudson, D. K. Steinberg, T. T. Sutton, J. E. Graves, R. J. Latour, *Deep-Sea Research Part I:*  
343 *Oceanographic Research Papers* **93**, 104–116, ISSN: 09670637, ([http://dx.doi.org/10.1016/j.dsr.](http://dx.doi.org/10.1016/j.dsr.2014.07.002)  
344 [2014.07.002](http://dx.doi.org/10.1016/j.dsr.2014.07.002)) (2014).
- 345 35. R. Schlitzer, *Deep-Sea Research Part II: Topical Studies in Oceanography* **49**, 1623–1644, ISSN: 09670645  
346 (2002).
- 347 36. J. P. Dunne, R. A. Armstrong, A. Gnnadesikan, J. L. Sarmiento, *Global Biogeochemical Cycles* **19**, 1–16,  
348 ISSN: 08866236 (2005).
- 349 37. T. DeVries, T. Weber, *Global Biogeochemical Cycles* **31**, 535–555, ISSN: 19449224 (2017).
- 350 38. K. Bisson, D. A. Siegel, T. DeVries, *Frontiers in Marine Science* **7**, 1–15, ISSN: 22967745 (2020).
- 351 39. D. A. Siegel *et al.*, *Global Biogeochemical Cycles* **28**, 181–196, ISSN: 08866236, ([http://doi.wiley.](http://doi.wiley.com/10.1002/2014GB004853)  
352 [com/10.1002/2014GB004853](http://doi.wiley.com/10.1002/2014GB004853)%)  
<http://doi.wiley.com/10.1002/2014GB004853>%) (Mar. 2014).
- 353 40. M. E. Nowicki, T. DeVries, D. A. Siegel, *Global Biogeochemical Cycles* **36**, e2021GB007083 (2022).
- 354 41. S. H. Jónasdóttir, A. W. Visser, K. Richardson, M. R. Heath, *Proceedings of the National Academy of*  
355 *Sciences* **112**, 12122–12126, ISSN: 0027-8424, arXiv: 0812.0143v2, ([http://www.pnas.org/lookup/](http://www.pnas.org/lookup/doi/10.1073/pnas.1512110112)  
356 [doi/10.1073/pnas.1512110112](http://www.pnas.org/lookup/doi/10.1073/pnas.1512110112)) (Sept. 2015).
- 357 42. C. H. Lucas *et al.*, *Global Ecology and Biogeography* **23**, 701–714, ISSN: 14668238 (2014).
- 358 43. J. Y. Luo *et al.*, *Global Biogeochemical Cycles* **34** (2020).
- 359 44. M. Vinogradov, *ICES reports* **18**, 114–120 (1962).

- 360 45. A. Ariza, J. C. Garijo, J. M. Landeira, F. Bordes, S. Hernández-León, *Progress in Oceanography* **134**,  
361 330–342, ISSN: 00796611, (<http://dx.doi.org/10.1016/j.pocean.2015.03.003>) (2015).
- 362 46. M. A. St. John *et al.*, *Frontiers in Marine Science* **3**, 1–6, ISSN: 2296-7745 (2016).
- 363 47. G. Mariani *et al.*, *Science advances* **6**, 1–9, ISSN: 23752548 (2020).
- 364 48. D. Bianchi, D. A. Carozza, E. D. Galbraith, J. Guiet, T. DeVries, *Science Advances* **7**, ISSN: 23752548  
365 (2021).
